# Supplementary material
Source: PubMed Central journal article supplement (PMC137905)

**EGFP-actin**

**+ $\Delta$ FM4-64**

**Before  
NMDA**

**Before  
NMDA**

**NMDA**

**NMDA**

**Before  
High K<sup>+</sup>**

**Before  
High K<sup>+</sup>**

**High K<sup>+</sup>**

**High K<sup>+</sup>**

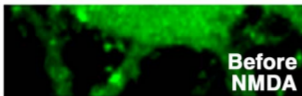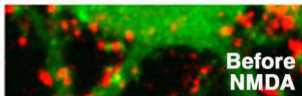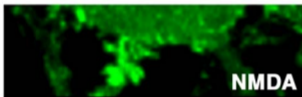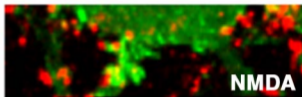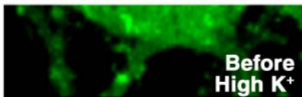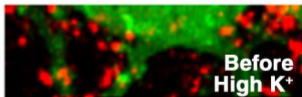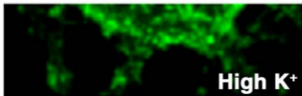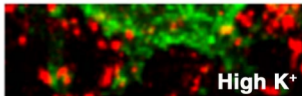

Supplement: pnas_212148999_19.pdf [file pnas_212148999_19.pdf]
