# Supplementary material
Source: PubMed Central journal article supplement (PMC137905)

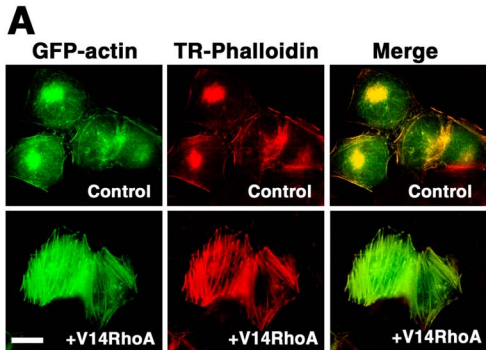

**C**

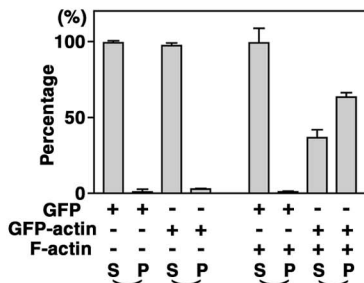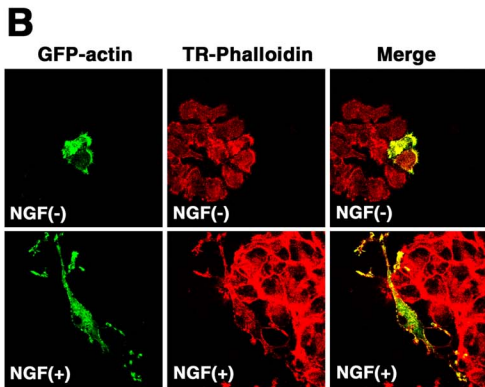

**D**

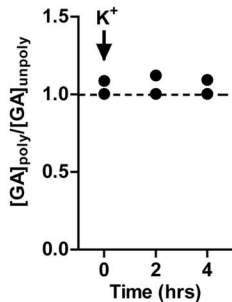

Supplement: pnas_212148999_14.pdf [file pnas_212148999_14.pdf]

**A**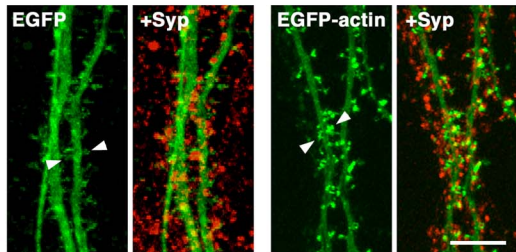**B**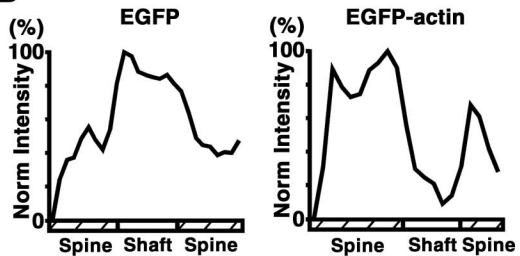**C**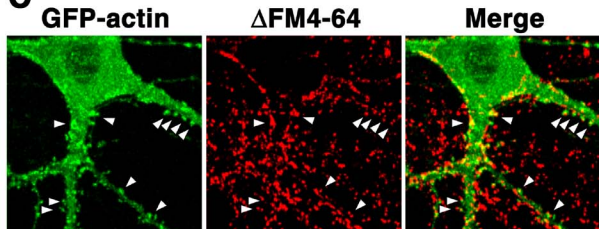

Supplement: pnas_212148999_15.pdf [file pnas_212148999_15.pdf]

**A****a**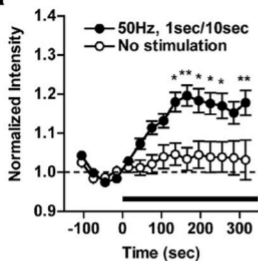**b**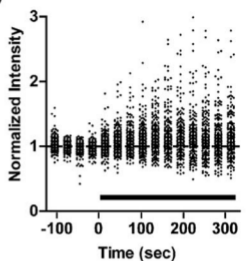**B****Before**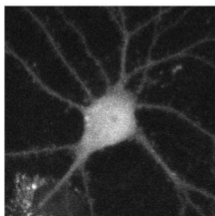**During**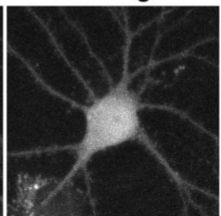

Supplement: pnas_212148999_16.pdf [file pnas_212148999_16.pdf]

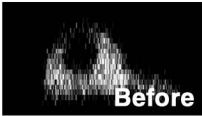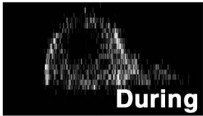

Supplement: pnas_212148999_17.pdf [file pnas_212148999_17.pdf]

**A**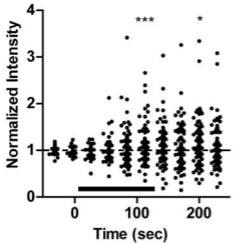**B**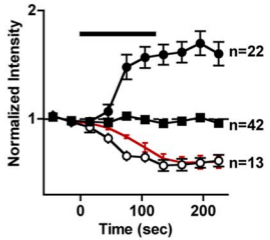

Supplement: pnas_212148999_18.pdf [file pnas_212148999_18.pdf]

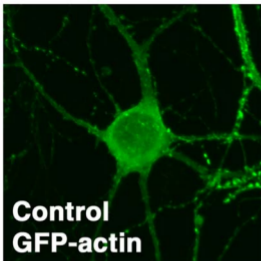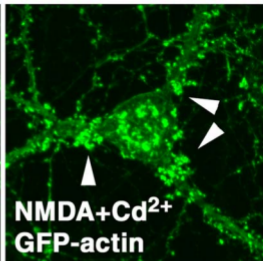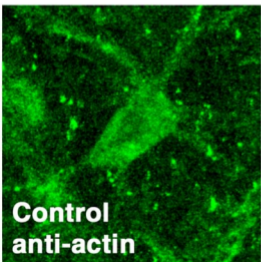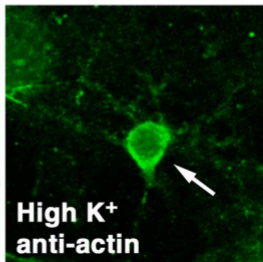

Supplement: pnas_212148999_20.pdf [file pnas_212148999_20.pdf]

**A**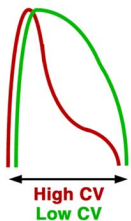**B**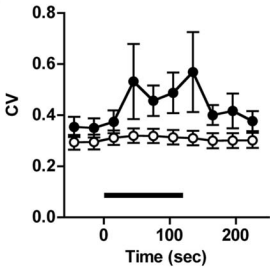**C**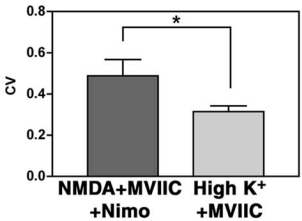

Supplement: pnas_212148999_21.pdf [file pnas_212148999_21.pdf]

**A**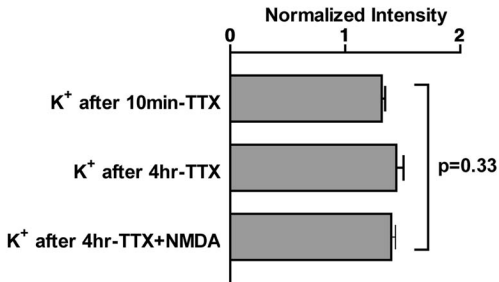**B**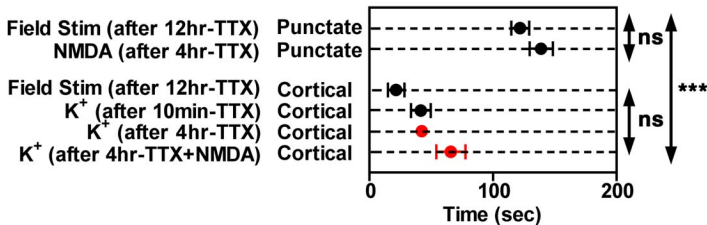

Supplement: pnas_212148999_22.pdf [file pnas_212148999_22.pdf]
